# Supplementary material
Source: MDPI journal article supplement (https://www.mdpi.com/2075-163X/13/4/572)
Supplement: s1 [file s1]

# Supplementary Material: Silver(I) Recovery by Ion Flotation Process from Aqueous Solutions in Cells with Spargers

Laura P. Ángeles Palazuelos, Mizraim U. Flores Guerrero, Miguel Pérez Labra, Iván A. Reyes Domínguez, Ramiro Escudero García, Francisco Patiño Cardona, Francisco R. Barrientos Hernández, Julio C. Juárez Tapia and Martín Reyes Pérez \*

**Table S1.** Calibration of the peristaltic feed.

| Area of the cell = 361.00 cm <sup>2</sup> |                            |         |                    |         |
|-------------------------------------------|----------------------------|---------|--------------------|---------|
| Pump Scale                                | Time to Feed<br>11.913 lts | lts/min | cm <sup>3</sup> /s | Jl cm/s |
| 1.00                                      | 17.50                      | 0.77    | 12.86              | 0.04    |
| 2.00                                      | 9.03                       | 1.50    | 24.92              | 0.07    |
| 3.00                                      | 6.26                       | 2.16    | 35.94              | 0.10    |
| 4.00                                      | 5.22                       | 2.59    | 43.10              | 0.12    |
| 5.00                                      | 3.51                       | 3.85    | 64.10              | 0.18    |
| 6.00                                      | 3.08                       | 4.38    | 73.05              | 0.20    |
| 7.00                                      | 2.40                       | 5.63    | 93.75              | 0.26    |
| 8.00                                      | 2.20                       | 6.14    | 102.27             | 0.28    |
| 9.00                                      | 2.05                       | 6.59    | 109.76             | 0.30    |
| 10.00                                     | 1.55                       | 8.71    | 145.16             | 0.40    |

**Table S2.** Calibration of the peristaltic discharge pump (tails).

| Area of the cell = 361.00 cm <sup>2</sup> |                                  |         |                    |         |
|-------------------------------------------|----------------------------------|---------|--------------------|---------|
| Pump Scale                                | Time to Down-<br>load 11.913 lts | lts/min | cm <sup>3</sup> /s | Jl cm/s |
| 1.00                                      | 15.10                            | 0.89    | 14.90              | 0.04    |
| 2.00                                      | 8.03                             | 1.68    | 28.02              | 0.08    |
| 3.00                                      | 5.19                             | 2.60    | 43.35              | 0.12    |
| 4.00                                      | 4.02                             | 3.36    | 55.97              | 0.16    |
| 5.00                                      | 3.23                             | 4.18    | 69.66              | 0.19    |
| 6.00                                      | 2.47                             | 5.47    | 91.09              | 0.25    |
| 7.00                                      | 2.28                             | 5.92    | 98.68              | 0.27    |
| 8.00                                      | 2.11                             | 6.40    | 106.64             | 0.30    |
| 9.00                                      | 2.00                             | 6.75    | 112.50             | 0.31    |
| 10.00                                     | 1.45                             | 9.31    | 155.17             | 0.43    |

**Table S3.** Calculation of gas surface velocity Jg (cm/s).

| Area of the cell = 361 cm <sup>2</sup> |                       |            |
|----------------------------------------|-----------------------|------------|
| Jg cm/s                                | Qg cm <sup>3</sup> /s | Qg lts/min |
| 0.1                                    | 36.1                  | 2.166      |
| 0.3                                    | 108.3                 | 6.498      |
| 0.5                                    | 180.5                 | 10.83      |
| 0.8                                    | 288.8                 | 17.328     |
| 1                                      | 361                   | 21.66      |
| 1.3                                    | 469.3                 | 28.158     |
| 1.5                                    | 541.5                 | 32.49      |
| 1.8                                    | 649.8                 | 38.988     |

---

|     |        |        |
|-----|--------|--------|
| 2   | 722    | 43.32  |
| 2.3 | 830.3  | 49.818 |
| 2.5 | 902.5  | 54.15  |
| 2.8 | 1010.8 | 60.648 |
| 3   | 1083   | 64.98  |

---

### Bubble Diameter Estimation Using the Drift Flux Model

The concept of drag analysis was originally introduced by Wallis to relate phase flow velocities, trapped gas and physical properties [30–33].

From the entrainment analysis, the terminal bubble slip velocity is estimated using the relationship for two-phase systems. The main expression of the entrainment analysis is as follows [30–33]:

$$U_t = \frac{Jg}{\epsilon_g} \pm \frac{Jl}{(1 - \epsilon_g)} \quad (1)$$

This equation is derived from the following analysis.

$$Qt = Qg \pm Ql \quad (2)$$

$$\frac{Qt}{V} = \frac{Qg}{Vg} \pm \frac{Ql}{Vl} \quad (3)$$

$$V = Ah; Vg = Ahg; Vl = Ah \quad (4)$$

$$\frac{Qt}{Ah} = \frac{Qg}{Ahg} \pm \frac{Ql}{Ahl} \quad (5)$$

$$\frac{Jt}{h} = \frac{Jg}{hg} \pm \frac{Jl}{hl} \quad (6)$$

$$Jt = \left( \frac{Jg}{hg} \pm \frac{Jl}{hl} \right) \times h \quad (7)$$

$$Jt = \frac{Jgh}{hg} \pm \frac{Jlh}{hl} = \frac{Jg}{hgh^{-1}} \pm \frac{Jl}{hlh^{-1}} \quad (8)$$

$$Jt = \frac{Jg}{\frac{hg}{h}} \pm \frac{Jl}{\frac{hl}{h}} \quad (9)$$

$$Jt = Ut; \frac{h}{h} = Eg; \frac{hl}{h} = El \quad (10)$$

Where El = Fraction of liquid = (1-Eg)

$$Ut = \frac{Jg}{Eg} \pm \frac{Jl}{(1 - Eg)} \quad (11)$$

The Drift Flux estimation method cited in the literature follows the following procedure [30–33]:

1. Estimate a value of  $m$  in 3
2. Calculate the terminal velocity of a bubble Equation (1).
3. Calculate the Reynolds number ( $Re_s$ ) of the bubble cloud and the bubble diameter ( $D_b$ ) with expressions (12) and (13), the calculation is carried out by first estimating a value of 1.

From experimental observations it has been determined that  $m$  is close to 3 in all cases. Therefore, the carry-over analysis can be solved interactively from this procedure.

$$U_{sb} = \frac{J_g}{\epsilon_g (1 - \epsilon_g)^m} - \frac{J_g - J_l}{(1 - \epsilon_g)^m} \quad (12)$$

$$Re_s = \frac{D_b * U_s * \rho l * (1 - \epsilon_g)}{\mu l} \quad (13)$$

The bubble diameter is approximated by the ratio:

$$D_b = \left( \frac{18 * \mu l * U_t}{g * \Delta \rho} (1 + 0.15 Re_s)^{0.687} \right)^{0.5} \quad (14)$$

Where  $\rho l = 1 \text{ gr/cm}^3$ ;  $\mu l = 0.01 \text{ gr/cms}$ ;  $g = 981.6 \text{ cm/s}^2$

Once the bubble diameter ( $D_b$ ) is obtained, this value is substituted by the estimated value in the calculation of the Reynolds number ( $Re_s$ ), and is substituted until it is equal to the estimated value. Once equalized, the value of  $m$  is calculated with the following expression:

$$m = \left( 4.45 + 18 * \frac{D_b}{D_c} \right) (Re_b)^{-0.1} \quad 1 < Re_s < 200 \quad (15)$$

Where:

$$Re_b = \frac{D_b * U_t * \rho l}{\mu l} \quad (16)$$

The obtained value of  $m$  is substituted in the calculation of equation 12 where it was estimated in a value of 3. Once this value is substituted, the calculated value is adjusted again, interactively with the value of  $m$ , and so on until the estimated value is equal to the calculated value.
